# Supplementary material for: High-throughput fabrication of antimicrobial phage microgels and example applications in food decontamination
Source: Springer Nature journal article supplement (doi:10.1038/s41596-024-00964-6), 2024-02-27
Supplement: MOESM1 [file 41596_2024_964_MOESM1_ESM10.pdf]

# High-throughput fabrication of antimicrobial phage microgels and example applications in food decontamination

In the format provided by the authors and unedited

## Supplementary information

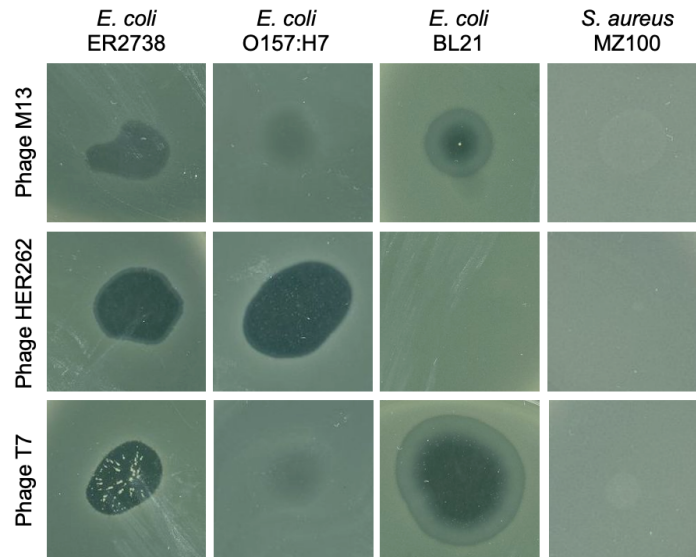

**Supplementary Figure 1. Specific bacteria-killing of phage M13, HER262 and T7.** Spot test of phage M13, HER262 and T7 on the lawn of *E. coli* ER2738, O157:H7, BL21, and *S. aureus* MZ100, respectively. Image adapted with permission from ref.<sup>1</sup>, Nature Portfolio.

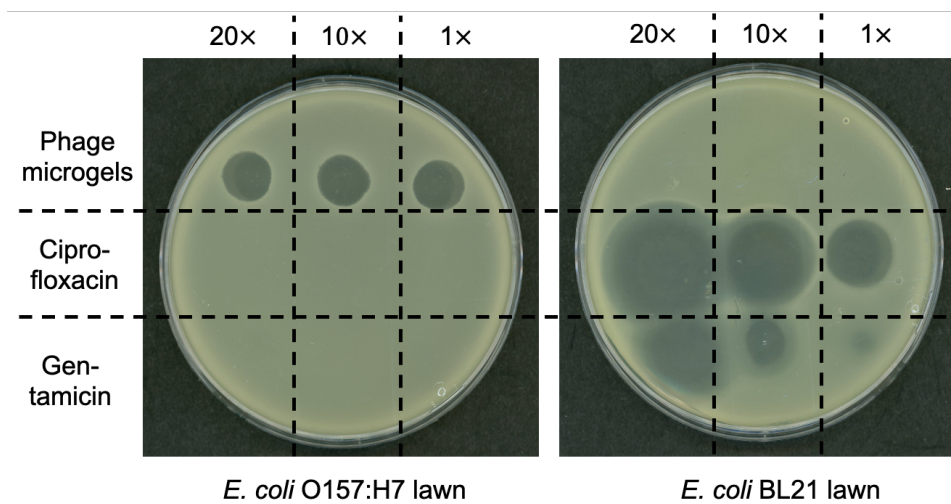

**Supplementary Figure 2. Comparison of antimicrobial function of M13+HER262+BSA+GA microgels and representative antibiotics (ciprofloxacin and gentamicin).** Spot test of

M13+HER262+BSA+GA microgel suspension, and representative antibiotics (ciprofloxacin and gentamicin) with different concentration on *E. coli* O157:H7 and BL21 lawns, respectively. Concentration gradient: Phage: 20×, 10×, and 1× of phage suspension prepared by the protocol. Ciprofloxacin and gentamicin: 20×, 10×, and 1× of minimal inhibitory concentration (MIC) against *E. coli* O157:H7 (Ciprofloxacin MIC: 0.03  $\mu\text{g mL}^{-1}$ ; Gentamicin MIC: 0.5  $\mu\text{g mL}^{-1}$ ).

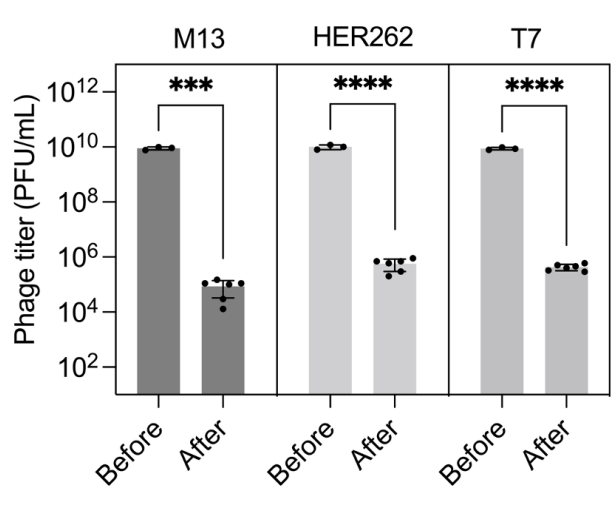

**Supplementary Figure 3. Desiccation-sensitivity of phage M13, HER262 and T7.** Titer count of phage M13, HER262 and T7 before (n=3 independent experiments for each type of phage) and after 1-h desiccation. (n=6 independent experiments for each type of phage) (M13: \*\*\*p=0.0005; HER262 and T7: \*\*\*\*p<0.0001). Data are presented as mean±SD with all data points. Statistical significance is derived from unpaired t-test. Image adapted with permission from ref.<sup>1</sup>, Nature Portfolio.

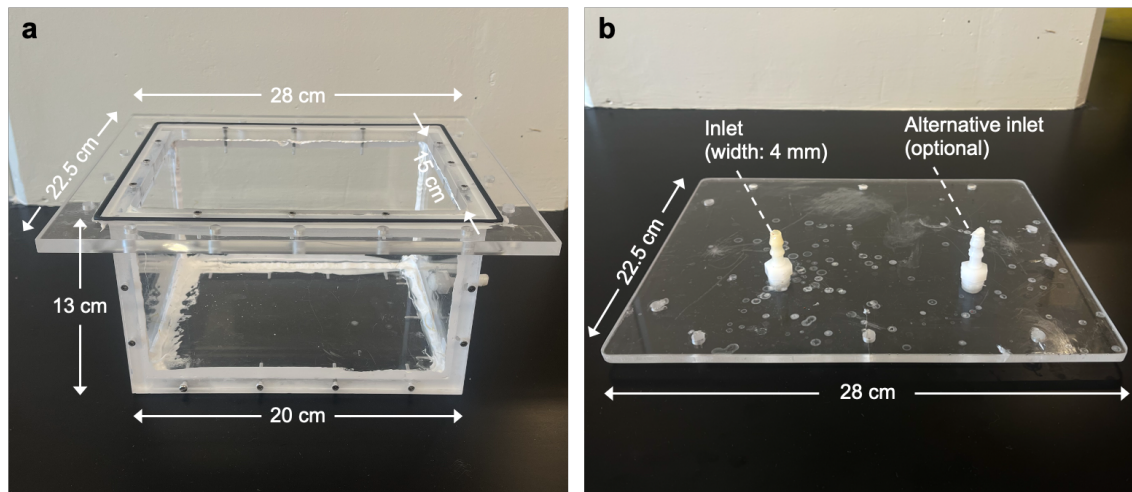

**Supplementary Figure 4. Design of the chamber for the preparation of honeycomb films. a.** Photograph of our transparent resinous chamber with size markings. **b.** Photograph of the transparent lid with an open-ended inlet (inner width: 4 mm) for adding polystyrene solution. The optional additional inlet can be used for preparing two films simultaneously.

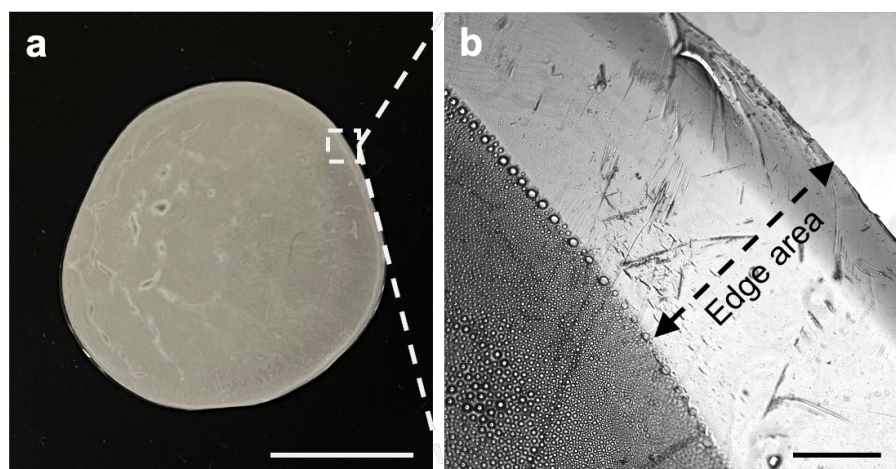

**Supplementary Figure 5. Edge area of the honeycomb films shows no micropores. a.** Photograph of a honeycomb film. Scale bar: 1 cm. **b.** Bright field image of the framed area in panel a, where the edge area of honeycomb film (indicated by arrow) has no micropores. Scale bar: 50  $\mu\text{m}$ .



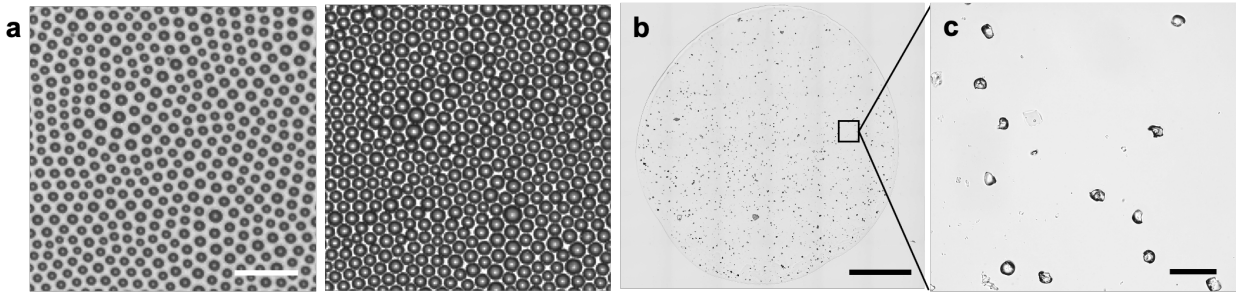

**Supplementary Figure 6. Optical microscopy characterization of honeycomb films and microgels.** **a**, Optical microscope images of the micropores on a honeycomb film under reflection mode and transmission mode respectively. Scale bar: 50  $\mu\text{m}$ . **b**, Bright field image of 5  $\mu\text{L}$  of phage microgel suspension. Scale bar: 1 mm. **c**, Zoomed-in bright field image of **b** showing free-stand microgels, isolated from the polystyrene template. Scale bar: 100  $\mu\text{m}$ . **b-c** adapted with permission from ref.<sup>1</sup>, Nature Portfolio.

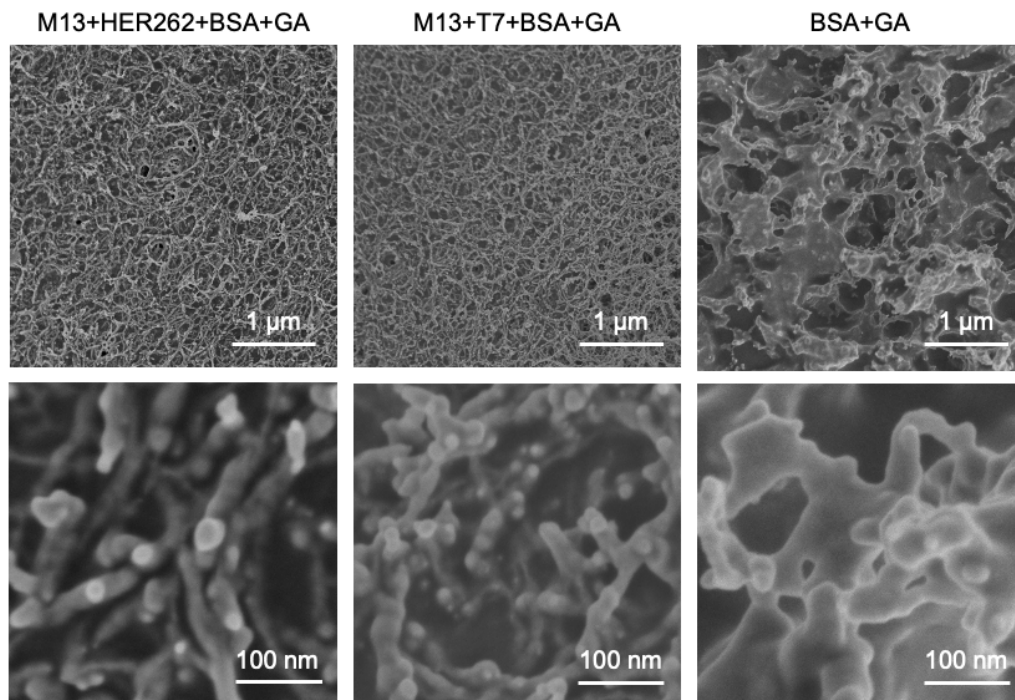

**Supplementary Figure 7. FE-SEM images of the nanostructure on the surface of M13+HER262+BSA+GA, M13+T7+BSA+GA microgels, respectively.** The images in the

bottom row are zoomed-in versions of the corresponding top images. Image adapted with permission from ref.<sup>1</sup>, Nature Portfolio.

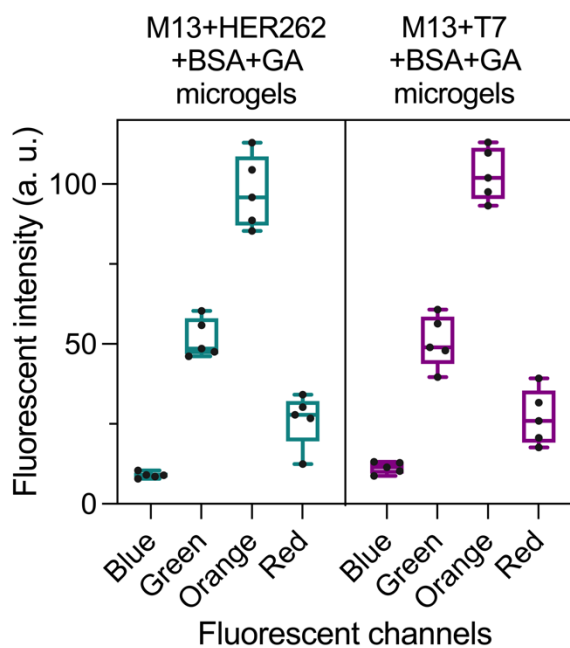

**Supplementary Figure 8. Fluorescence intensity of M13+HER262+BSA+GA, M13+T7+BSA+GA microgels imaged under four different channels.** Green channel: microgels excited at 465 nm and imaged using a  $\lambda = 515$  nm optical filter. Orange channel: microgels excited at 528 nm and imaged using a  $\lambda = 590$  nm optical filter. Red channel: microgels excited at 625 nm and imaged using a  $\lambda = 670$  nm optical filter. Box plots show minimum to maximum (whiskers), 25–75% (box), median (band inside) with all data points. a.u. arbitrary unit.  $n = 5$  microgels per fluorescence channel. Blue channel: microgels excited at 340 nm and imaged using a  $\lambda = 435$  nm optical filter.

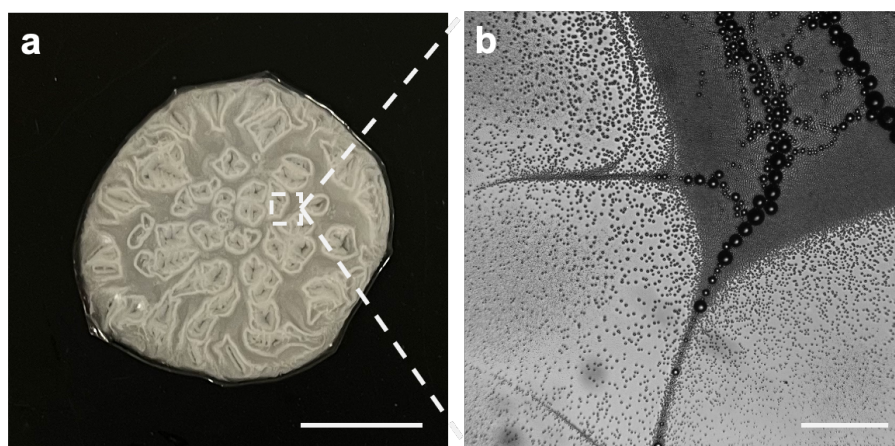

**Supplementary Figure 9. Formation of honeycomb films with disordered micropores.** **a.** Photograph of a honeycomb film prepared under external air interference. Scale bar: 1 cm. **b.** Bright field image of the the framed area in panel **a**, where micropores do not exhibit homogenous size and ordered arrangement. Scale bar: 300  $\mu\text{m}$ .

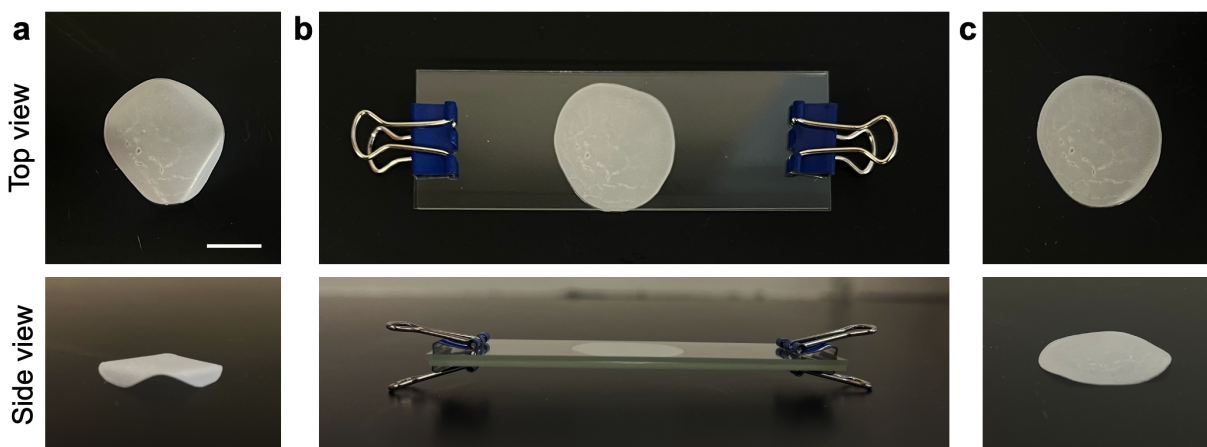

**Supplementary Figure 10. Process of turning crimped honeycomb film flat.** **a.** Photographs of a crimped honeycomb film. **b.** Photographs of the film placing between two glass slides and secured with a clamp. **c.** Photographs of the flat honeycomb film after placing in the oven at 50  $^{\circ}\text{C}$  for 30 mins. Scale bar: 1 cm.

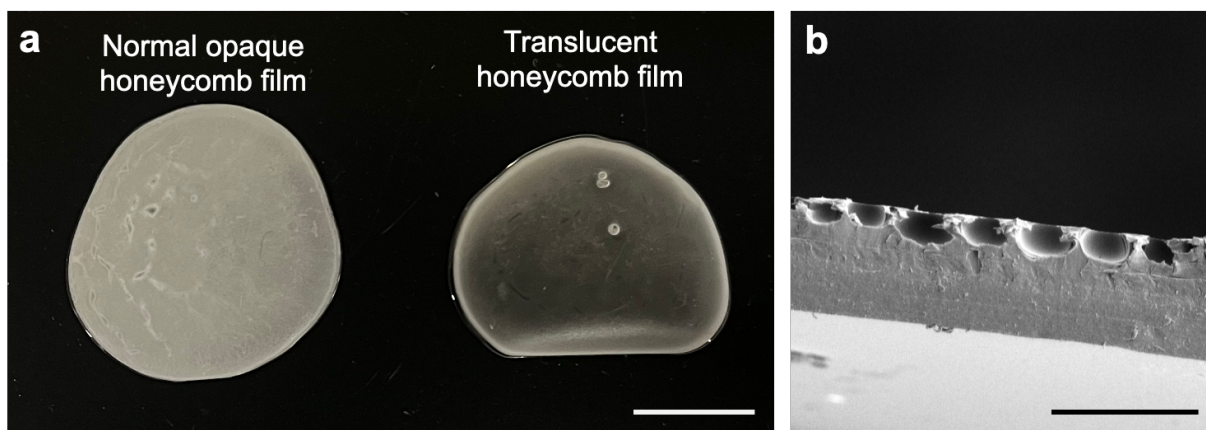

**Supplementary Figure 11. Formation of a translucent honeycomb film.** **a.** Photograph of a honeycomb film which was taken out of the humid chamber before solidifying (translucent) comparing to a normal honeycomb film (opaque). Scale bar: 1 cm. **b.** Cross-sectional SEM image of the translucent honeycomb film showing shallower pores comparing to **Fig. 2e**. Scale bar: 50  $\mu\text{m}$ .

## Reference

1. Tian, L. *et al.* Self-assembling nanofibrous bacteriophage microgels as sprayable antimicrobials targeting multidrug-resistant bacteria. *Nat. Commun.* **13**, 7158 (2022).
